# Supplementary material for: Subjective Experience of Speech Depending on the Acoustic Treatment in an Ordinary Room
Source: MDPI journal article supplement (doi:10.3390/ijerph182312274), 2021-11-23
Supplement: s1 [file s1]

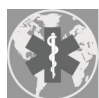

### Supplementary 1: Results on Room Acoustic Parameters

Following four graphs presents the results on room acoustic parameters. **Table S1** below explains the set-up for each configuration.

*Table S1.* Configuration Description.

| Configuration |              | Ceiling                      | Wall treatment                                                          |
|---------------|--------------|------------------------------|-------------------------------------------------------------------------|
| No            | Abbreviation |                              |                                                                         |
| 1             | 52CA_F       | 52 m <sup>2</sup> absorptive | No wall treatment                                                       |
| 2             | 52CA_9WA_F   | 52 m <sup>2</sup> absorptive | 9 m <sup>2</sup> absorptive tiles distributed on two walls              |
| 3             | 52CA_9VWD_F  | 52 m <sup>2</sup> absorptive | 9 m <sup>2</sup> vertically oriented diffusers distributed on two walls |

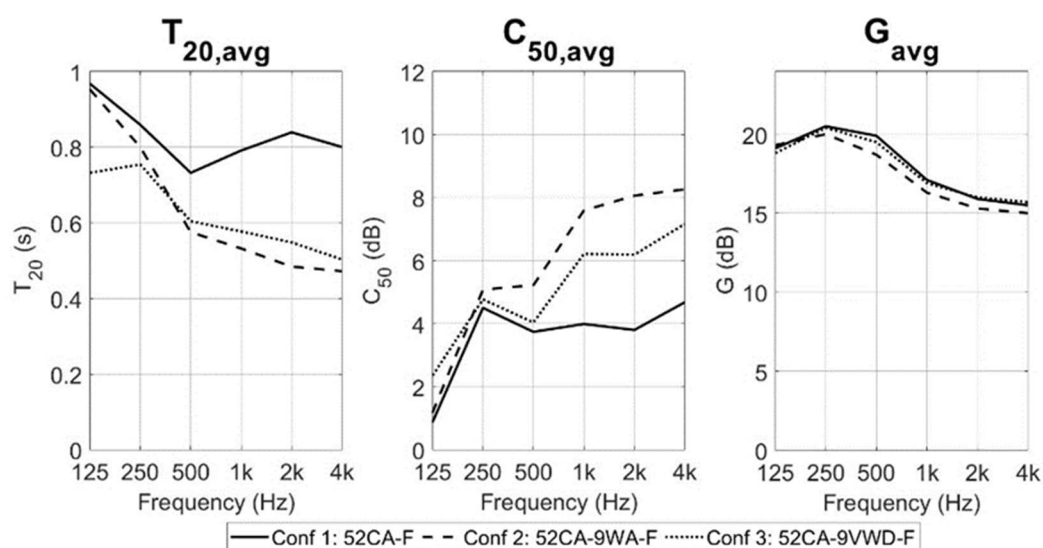

**Figure S1.** Average values over two sources and seven receiver positions for room acoustic parameters reverberation time, T<sub>20</sub>, speech clarity, C<sub>50</sub>, and sound strength, G.

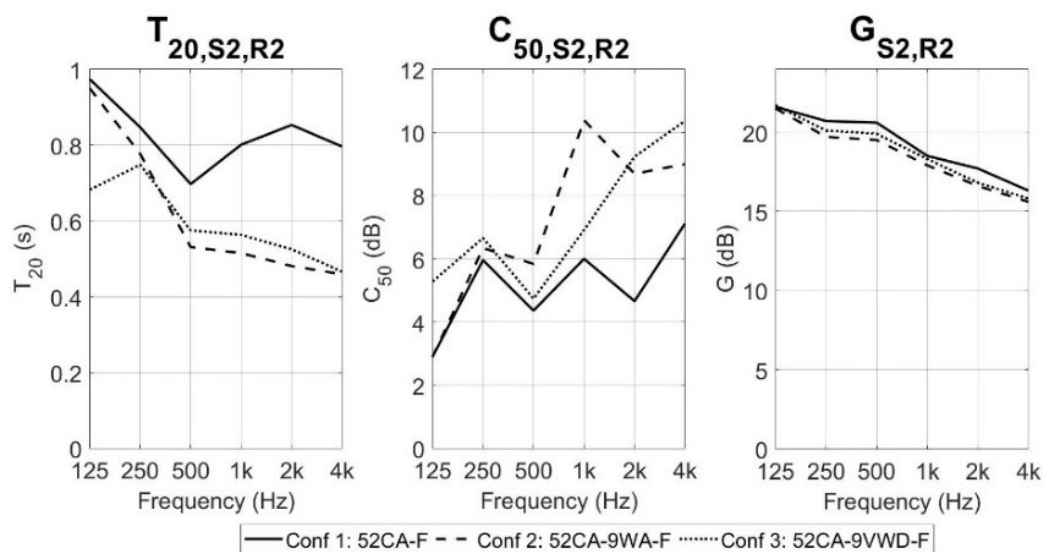

**Figure S2.** The three room acoustic parameters evaluated, reverberation time,  $T_{20}$ , speech clarity,  $C_{50}$ , and sound strength,  $G$ , for **specific receiver positions** using source position S2 and **receiver position R2**, i.e., close to the speaker.

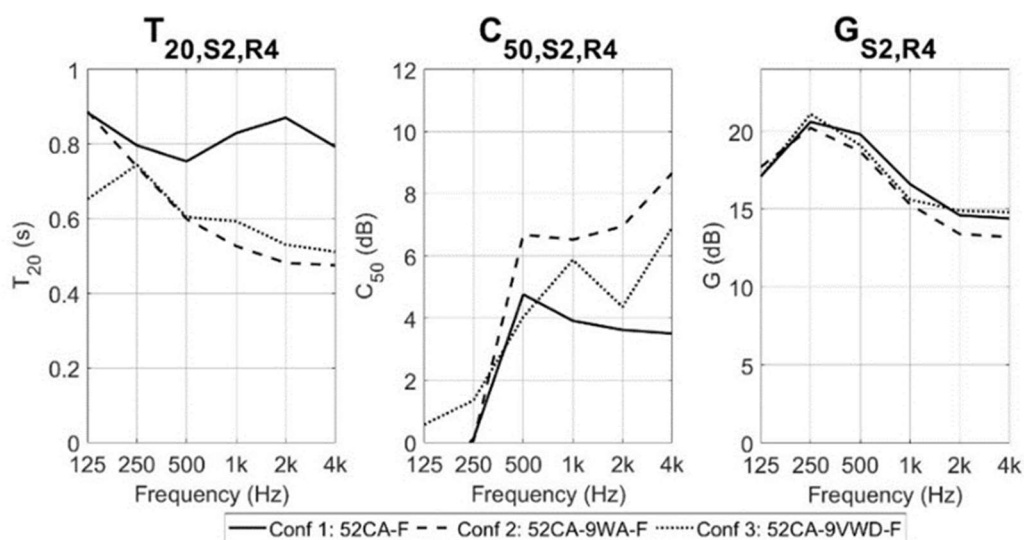

**Figure S3.** The three room acoustic parameters evaluated, reverberation time,  $T_{20}$ , speech clarity,  $C_{50}$ , and sound strength,  $G$ , for **specific receiver positions** using source position S2 and **receiver position R4**, i.e., in the corner.

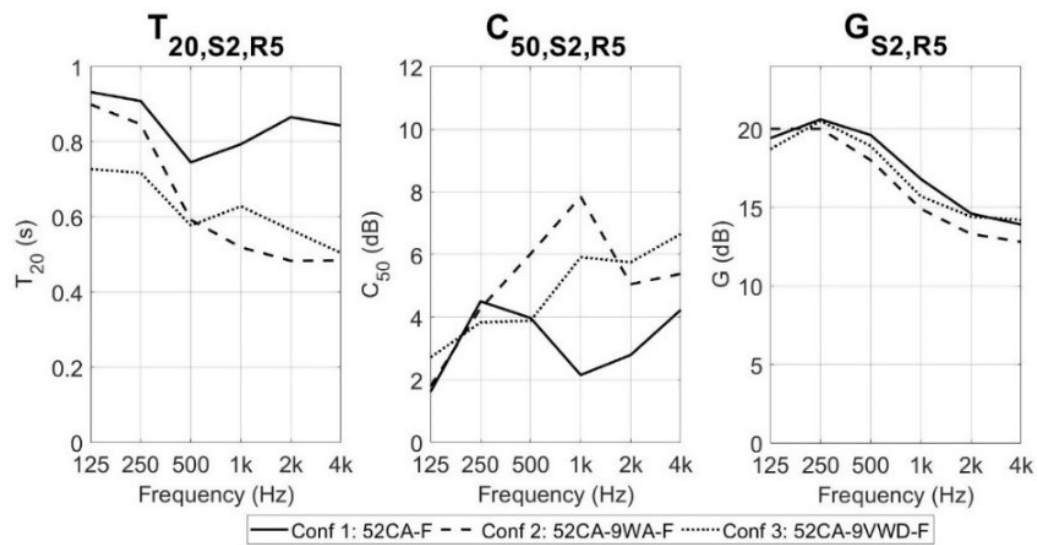

**Figure S4.** The three room acoustic parameters evaluated, reverberation time,  $T_{20}$ , speech clarity,  $C_{50}$ , and sound strength,  $G$ , for specific receiver positions using source position S2 and receiver position R5, i.e., same x-position as the speaker in the rear part of the room.
