# Supplementary material for: Subjective Experience of Speech Depending on the Acoustic Treatment in an Ordinary Room
Source: MDPI journal article supplement (doi:10.3390/ijerph182312274), 2021-11-23
Supplement: s1 [file s1]

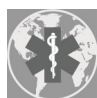

## Supplementary 2: Results on linear regression

Following two tables presents the linear regression to sound quality, **Table S2**, and attributes, **Table S3**, using room acoustic parameters as explanatory variable.

**Table S2.** Equations for linear regression with degree of explanation,  $R^2$ , for sound quality using room acoustic parameters as explanatory parameter.

| Room acoustic parameter | Frequency<br>(Hz) | Regression                      |           |
|-------------------------|-------------------|---------------------------------|-----------|
|                         |                   | Equation                        | $R^2$ (%) |
| T <sub>20</sub>         | 125               | $7.03 - 0.168 \times T20\_125$  | 0         |
| T <sub>20</sub>         | 250               | $12.56 - 7.17 \times T20\_250$  | 11        |
| T <sub>20</sub>         | 500               | $14.00 - 11.28 \times T20\_500$ | 44        |
| T <sub>20</sub>         | 1000              | $10.83 - 6.14 \times T20\_1000$ | 35        |
| T <sub>20</sub>         | 2000              | $9.50 - 4.16 \times T20\_2000$  | 30        |
| T <sub>20</sub>         | 4000              | $9.75 - 4.82 \times T20\_4000$  | 34        |
| C <sub>50</sub>         | 125               | $6.38 + 0.32 \times C50\_125$   | 28        |
| C <sub>50</sub>         | 250               | $5.82 + 0.289 \times C50\_250$  | 30        |
| C <sub>50</sub>         | 500               | $3.65 + 0.659 \times C50\_500$  | 24        |
| C <sub>50</sub>         | 1000              | $3.89 + 0.486 \times C50\_1000$ | 68        |
| C <sub>50</sub>         | 2000              | $3.66 + 0.569 \times C50\_2000$ | 85        |
| C <sub>50</sub>         | 4000              | $3.49 + 0.492 \times C50\_4000$ | 67        |
| G                       | 125               | $3.28 + 0.19 \times G\_125$     | 7         |
| G                       | 250               | $41.27 - 1.69 \times G\_250$    | 28        |
| G                       | 500               | $9.46 - 0.13 \times G\_500$     | 1         |
| G                       | 1000              | $4.13 + 0.16 \times G\_1000$    | 3         |
| G                       | 2000              | $2.83 + 0.27 \times G\_2000$    | 9         |
| G                       | 4000              | $1.42 + 0.37 \times G\_4000$    | 11        |

**Table S3.** Equations for linear regression with degree of explanation,  $R^2$ , for attributes using room acoustic parameters as explanatory variable.

| Room acoustic parameter | Frequency<br>(Hz) | Regression                         |       |
|-------------------------|-------------------|------------------------------------|-------|
|                         |                   | Equation                           | $R^2$ |
| T <sub>20</sub>         | 125               | $4.28 - 2.31 \times T_{20\_125}$   | 11    |
| T <sub>20</sub>         | 250               | $7.82 - 6.9 \times T_{20\_250}$    | 26    |
| T <sub>20</sub>         | 500               | $8.30 - 9.47 \times T_{20\_500}$   | 77    |
| T <sub>20</sub>         | 1000              | $6.22 - 6.06 \times T_{20\_1000}$  | 84    |
| T <sub>20</sub>         | 2000              | $5.10 - 4.41 \times T_{20\_2000}$  | 82    |
| T <sub>20</sub>         | 4000              | $5.10 - 4.67 \times T_{20\_4000}$  | 80    |
| C <sub>50</sub>         | 125               | $2.18 + 0.09 \times C_{50\_125}$   | 6     |
| C <sub>50</sub>         | 250               | $2.12 + 0.07 \times C_{50\_250}$   | 3     |
| C <sub>50</sub>         | 500               | $0.06 + 0.46 \times C_{50\_500}$   | 30    |
| C <sub>50</sub>         | 1000              | $0.46 + 0.30 \times C_{50\_1000}$  | 66    |
| C <sub>50</sub>         | 2000              | $0.76 + 0.288 \times C_{50\_2000}$ | 50    |
| C <sub>50</sub>         | 4000              | $0.31 + 0.29 \times C_{50\_4000}$  | 59    |
| G                       | 125               | $-0.98 + 0.17 \times G\_125$       | 14    |
| G                       | 250               | $29.78 - 1.35 \times G\_250$       | 43    |
| G                       | 500               | $11.21 - 0.46 \times G\_500$       | 16    |
| G                       | 1000              | $2.78 - 0.03 \times G\_1000$       | 0     |
| G                       | 2000              | $1.58 + 0.05 \times G\_2000$       | 1     |
| G                       | 4000              | $1.57 + 0.05 \times G\_4000$       | 1     |
